# Supplementary material
Source: HighWire-hosted journal article supplement (https://bmjopen.bmj.com/content/14/8/e081419)
Supplement: inline-supplementary-material-2 [file inline-supplementary-material-2.pdf]

Version 1 14-04-2023

### Additional file 2 – Data collection form – students (survey & interview guide)

Data collection will be via a **survey** administered to all students at the conclusion of their placement. The survey is designed to capture the experience and impact (both intended and unintended impact) of the clinical placement.

**Interviews**, based on purposeful sampling, will also be conducted to further explore survey questions in detail. Recruitment for the interviews is via the survey (additional question at the end of the survey).

Version 1 14-04-2023

# Lachlan student evaluation SURVEY

---

## PART 1: INSTRUCTIONS

This survey should be completed at the **conclusion of your placement**.

The survey results are used for evaluation of our placements to provide students with the best experience possible. We greatly value you taking the time to provide information about your experiences. We will not contact you in relation to any of your survey responses unless you give us permission to do so, or request to be contacted.

Please click on this link and review the Participant Information Sheet prior to completing the survey [LINK].

---

## PART 2: CONSENT

By clicking on the 'start survey' button, this tells us you want to take part in the study, and consent to do so.

[START SURVEY BUTTON]

---

Version 1 14-04-2023

**PART 3: ABOUT YOU AND YOUR PLACEMENT**

Current residential location: Metro / Rural

Age \_\_\_\_\_

What course you are studying \_\_\_\_\_

Accommodation during placement \_\_\_\_\_

Did you receive a grant to support you on placement (yes / no)

Placement organisation \_\_\_\_\_

Placement organisation location \_\_\_\_\_

Placement type (e.g. hospital, aged care, childcare) \_\_\_\_\_

Length of placement (weeks) \_\_\_\_\_

Topic for your student project \_\_\_\_\_

Project presentation details (e.g. presented to 3 staff and 5 families) \_\_\_\_\_

Did you have visitors while on placement (e.g. family or friends) \_\_\_\_\_

If so, how many \_\_\_\_\_ and how long did they stay \_\_\_\_\_?

Did you engage with any community groups while on placement? Please list \_\_\_\_\_

Have you attended the Parkes Country University Centre (CUC), either on-site or via an online platform? (yes / no)

If so, please provide context (e.g. 3 hours per week as a study space; or attend on-site for a 1-hour training/education session).

Can you please list all the costs that you have incurred because of this rural clinical placement? For example, meals, travel, lost work, etc.

-----

Version 1 14-04-2023

**PART 4: IMPACT**

Your placement was designed to impact multiple areas.

Can you please reflect on how this placement has impacted [FREE TEXT FOR EACH OPTION – LEAVE BLANK IF NO IMPACT ON AN AREA]:

- a. Your learning
- b. Your connection with the rural community in general, and specifically in relation to:
  - The student project
  - Bringing visitors to the region (student friends and family)
  - Student involvement in extracurricular activities e.g. community activities
  - Student connection to the First Nation community
- c. Your understanding of First Nation culture (consider the impact of the rural readiness training module and First Nations cultural experience)
- d. Your capabilities
- e. Your experience
  - Consider the student mentoring program (if applicable)
- f. Your skills
- g. Your sense of belonging
- h. Community referrals to health services
- i. Community referrals to community programs
- j. Community engagement in health prevention programs
- k. Community access to education
  - Are you able to identify specific opportunities for shared knowledge with the community
- l. Teamwork internal to your placement organization
- m. Teamwork external to your placement organization
- n. Health worker employment and/or retention in rural areas
- o. The local economy (student spending, visitor spending etc)

Can you think of any other way this placement has had an impact (positive, negative or neutral)? [FREE TEXT RESPONSE]

Please reflect on the barriers and facilitators to achieving the impacts described above. [FREE TEXT RESPONSE]

Version 1 14-04-2023

Student intent to work rurally post-graduation (adapted from previous published surveys (Isaac et al., 2014; The University of Melbourne, 2020)):

| Variables                                                   | Question                                                                                                                                                                                                                                                                                                        |
|-------------------------------------------------------------|-----------------------------------------------------------------------------------------------------------------------------------------------------------------------------------------------------------------------------------------------------------------------------------------------------------------|
| Rural/non-rural background                                  | Prior to this placement, have you previously lived in a Regional, Rural, Remote area?                                                                                                                                                                                                                           |
| Cohort                                                      | In what year are you currently studying? (e.g. 2nd year of study)                                                                                                                                                                                                                                               |
| Conscription status                                         | Did you choose to complete this placement through (or affiliated with) the Charles Sturt University's Three Rivers Department of Rural Health?<br>Yes it was my choice / I needed encouragement to choose this option / No, it was the only feasible option                                                     |
| <b>Current</b> intended work location                       | Please answer the following two questions, reflecting on how you feel now, at the <b>conclusion of this placement</b> .<br><br>When you have completed your course, in what area do you intend to work? (Metropolitan, Outer Metro, Regional, Rural, Remote)                                                    |
| <b>Current</b> level of interest in intended work location  | How strong is your interest in working in that location (your answer to the previous question)?<br><br>On a scale of 1 to 5, with 1 = not very strong at all, and 5 = very strong, please circle which applies to you.                                                                                          |
| <b>Previous</b> intended work location                      | Please answer the same two questions, reflecting on how you felt <b>prior to this placement</b> .<br><br>When you have completed your course, in what area do you intend to work? (Metropolitan, Outer Metro, Regional, Rural, Remote)                                                                          |
| <b>Previous</b> level of interest in intended work location | How strong is your interest in working in that location (your answer to the previous question)?<br><br>On a scale of 1 to 5, with 1 = not very strong at all, and 5 = very strong, please circle which applies to you.                                                                                          |
| Impact of the placement                                     | How strongly do you agree / disagree with this statement:<br><br>This placement has encouraged me to consider living and working in a Regional, Rural, Remote location after I graduate.<br><br>On a scale of 1 to 5, with 1 = not very strong at all, and 5 = very strong, please circle which applies to you. |
| Specialty                                                   | At this point in time, in what clinical area do you plan to work?                                                                                                                                                                                                                                               |

Version 1 14-04-2023

**PART 5: PLACEMENT OVERVIEW**

Finally, can you please reflect on your most recent placement experience in the Lachlan area and rate the following statements using the scale from 1-5:

|                                                                                                       | 1. Strongly<br><b>disagree</b><br>(1) | 2.<br>Somewhat<br>disagree (2) | 3. Neither<br>agree nor<br>disagree (3) | 4.<br>Somewhat<br>agree (4) | 5. Strongly<br><b>agree</b> (5) |
|-------------------------------------------------------------------------------------------------------|---------------------------------------|--------------------------------|-----------------------------------------|-----------------------------|---------------------------------|
| The placement met my expectations (1)                                                                 | <input type="radio"/>                 | <input type="radio"/>          | <input type="radio"/>                   | <input type="radio"/>       | <input type="radio"/>           |
| The placement met my learning objectives (2)                                                          | <input type="radio"/>                 | <input type="radio"/>          | <input type="radio"/>                   | <input type="radio"/>       | <input type="radio"/>           |
| I felt welcomed by the host organisation (3)                                                          | <input type="radio"/>                 | <input type="radio"/>          | <input type="radio"/>                   | <input type="radio"/>       | <input type="radio"/>           |
| I received an adequate placement orientation (4)                                                      | <input type="radio"/>                 | <input type="radio"/>          | <input type="radio"/>                   | <input type="radio"/>       | <input type="radio"/>           |
| I had adequate access to clinical learning opportunities and learning resources (5)                   | <input type="radio"/>                 | <input type="radio"/>          | <input type="radio"/>                   | <input type="radio"/>       | <input type="radio"/>           |
| I was satisfied with the process by which I received feedback on my performance (6)                   | <input type="radio"/>                 | <input type="radio"/>          | <input type="radio"/>                   | <input type="radio"/>       | <input type="radio"/>           |
| I was satisfied with the clinical supervision I was provided during the placement (7)                 | <input type="radio"/>                 | <input type="radio"/>          | <input type="radio"/>                   | <input type="radio"/>       | <input type="radio"/>           |
| I felt I had a say in the planning and outcomes of this placement (8)                                 | <input type="radio"/>                 | <input type="radio"/>          | <input type="radio"/>                   | <input type="radio"/>       | <input type="radio"/>           |
| The outcomes of this placement met the intended goals (9)                                             | <input type="radio"/>                 | <input type="radio"/>          | <input type="radio"/>                   | <input type="radio"/>       | <input type="radio"/>           |
| I contributed to the activity or service capacity of the host organisation (10)                       | <input type="radio"/>                 | <input type="radio"/>          | <input type="radio"/>                   | <input type="radio"/>       | <input type="radio"/>           |
| The skills and experiences gained through the placement were relevant to my future health career (11) | <input type="radio"/>                 | <input type="radio"/>          | <input type="radio"/>                   | <input type="radio"/>       | <input type="radio"/>           |
| I had the opportunity to become immersed in the local community (12)                                  | <input type="radio"/>                 | <input type="radio"/>          | <input type="radio"/>                   | <input type="radio"/>       | <input type="radio"/>           |
| I felt I belonged in the host organisation and community I was placed in (13)                         | <input type="radio"/>                 | <input type="radio"/>          | <input type="radio"/>                   | <input type="radio"/>       | <input type="radio"/>           |
| An identified community need or organisational gap was met by this placement (14)                     | <input type="radio"/>                 | <input type="radio"/>          | <input type="radio"/>                   | <input type="radio"/>       | <input type="radio"/>           |
| Cultural safety was maintained during this placement (15)                                             | <input type="radio"/>                 | <input type="radio"/>          | <input type="radio"/>                   | <input type="radio"/>       | <input type="radio"/>           |

Page 6 of 13

Version 1 14-04-2023

|                                                                                                                                               |                       |                       |                       |                       |                       |
|-----------------------------------------------------------------------------------------------------------------------------------------------|-----------------------|-----------------------|-----------------------|-----------------------|-----------------------|
| I had the opportunity to engage with professions different to my own (16)                                                                     | <input type="radio"/> |
| I feel that the outcomes achieved by this project have the potential to have a sustainable impact on the community and / or organisation (17) | <input type="radio"/> |
| I feel that the outcomes of the project will be implemented in the future (18)                                                                | <input type="radio"/> |
| I would recommend this placement to other students (19)                                                                                       | <input type="radio"/> |

We are always seeking to improve the placement experiences we provide students. Please use this space to let us know what worked well or what could be improved.

Version 1 14-04-2023

---

**PART 6: ADDITIONAL CONSENT**

A) We are interested to understand whether your placement experience effects where you work in future, and how it has influenced you personally or professionally. To help us understand this, would like to link your survey responses to your workplace location in future.

Do you consent to the research team accessing the AHPRA [Australian Health Practitioner Regulation Agency - Home \(ahpra.gov.au\)](https://www.ahpra.gov.au) website, to report on your location of work (postcode; and metro versus rural), noting all data would be de-identified and aggregated prior to publication? **Yes / No**

I consent to my survey responses being linked to my workplace postcode at the following intervals

- ☐ First year of practice (1)
- ☐ Five years post graduation (2)
- ☐ Ten years post graduation (3)

---

B) We would also like to speak to students who have been on placement in the Lachlan area to explore your experience of the placement.

Do you consent to be contacted regarding participation in a 30-45 minute interview to further explore these survey questions in detail?

- ☐ Yes, please contact me via:
  - ☐ No, thank you
-

Version 1 14-04-2023

C) Would you like to be sent the results of this study in about 12 months time?

☐ Yes, please send me the results (provide email address):

☐ No, thank you

---

D) Would you like to subscribe to Three Rivers Department of Rural Health monthly newsletter?

☐ Yes, I will subscribe by clicking on the following link [LINK]

☐ No, thank you

---

End of survey. Thankyou for your time. Please press the submit button [SUBMIT]

End of Survey

---

Version 1 14-04-2023

# Lachlan student evaluation

## INTERVIEW GUIDE

---

### PART 1: INSTRUCTIONS

This interview will occur at the **conclusion of your placement**. The interview results are used for evaluation of our placements to provide students with the best experience possible. We greatly value you taking the time to provide information about your experiences.

The interview will take between 30 and 45 minutes. We will only record the interview if you give us permission to do so. Your interview will be combined with multiple other interviews to ensure that you remain anonymous.

---

### PART 2: CONSENT

Prior to commencing ensure the participant has read and understood the Participant Information Sheet and has provided written informed consent (check for consent to record the interview).

---

Version 1 14-04-2023

**PART 3: ABOUT YOU AND YOUR PLACEMENT**

Current residential location: Metro / Rural

Age \_\_\_\_\_

What course you are studying \_\_\_\_\_

Accommodation during placement \_\_\_\_\_

Did you receive a grant to support you on placement (yes / no)

Placement organisation \_\_\_\_\_

Placement organisation location \_\_\_\_\_

Placement type (e.g. hospital, aged care, childcare) \_\_\_\_\_

Length of placement (weeks) \_\_\_\_\_

Did you have visitors while on placement (e.g. family or friends) \_\_\_\_\_

If so, how many \_\_\_\_\_ and how long did they stay \_\_\_\_\_?

Have you attended the Parkes Country University Centre (CUC), either on-site or via an online platform? (yes / no)

If so, please provide context (e.g. 3 hours per week as a study space; or attend on-site for a 1-hour training/education session).

Can you please list all the costs that you have incurred because of this rural clinical placement? For example, meals, travel, lost work, etc.  
-----

Version 1 14-04-2023

**PART 4: IMPACT**

Your placement was designed to impact multiple areas.

Can you please reflect on how this placement has impacted (choose a few areas to explore and continually ask about the “value” of the impact):

- a. The impact on you, and on other students, to work in Regional, Rural, Remote areas post graduation
- b. Your learning
- c. Your connection with the rural community in general, and specifically in relation to:
  - o The student project
  - o Bringing visitors to the region (student friends and family)
  - o Student involvement in extracurricular activities e.g. community activities
  - o Student connection to the First Nation community
- d. Your understanding of First Nation culture (consider the impact of the rural readiness training module and First Nations cultural experience)
- e. Your capabilities
- f. Your experience
  - o Consider the student mentoring program (if applicable)
- g. Your skills
- h. Your sense of belonging
- i. Community referrals to health services
- j. Community referrals to community programs
- k. Community engagement in health prevention programs
- l. Community access to education
  - o Are you able to identify specific opportunities for shared knowledge with the community
- m. Teamwork internal to your placement organization
- n. Teamwork external to your placement organization
- o. Health worker employment and/or retention in rural areas
- p. The local economy (student spending, visitor spending etc)

Can you think of any other way this placement has had an impact (positive, negative or neutral)?

Please reflect on the barriers and facilitators to achieving the impacts described above.

Version 1 14-04-2023

**PART 5: ADDITIONAL CONSENT**

A) Would you like to be sent the results of this study in about 12 months time?

- ☐ Yes, please send me the results (provide email address):
- ☐ No, thank you
- 

B) Would you like to subscribe to Three Rivers Department of Rural Health monthly newsletter?

- ☐ Yes, I will subscribe by clicking on the following link [LINK]
- ☐ No, thank you
- 

End of Interview

---

**REFERENCES**

Isaac, V, Watts, L, Forster, L, & McLachlan, CS. (2014). The influence of rural clinical school experiences on medical students' levels of interest in rural careers. *Human Resources for Health*, 12(1), 48. <https://doi.org/10.1186/1478-4491-12-48>

The University of Melbourne. (2020). STUDENT PLACEMENT SURVEY REVIEW.
